# Supplementary material for: CAR T-Cells for CNS Lymphoma: Driving into New Terrain?
Source: MDPI journal article supplement (doi:10.3390/cancers13102503), 2021-05-20
Supplement: s1 [file s1]

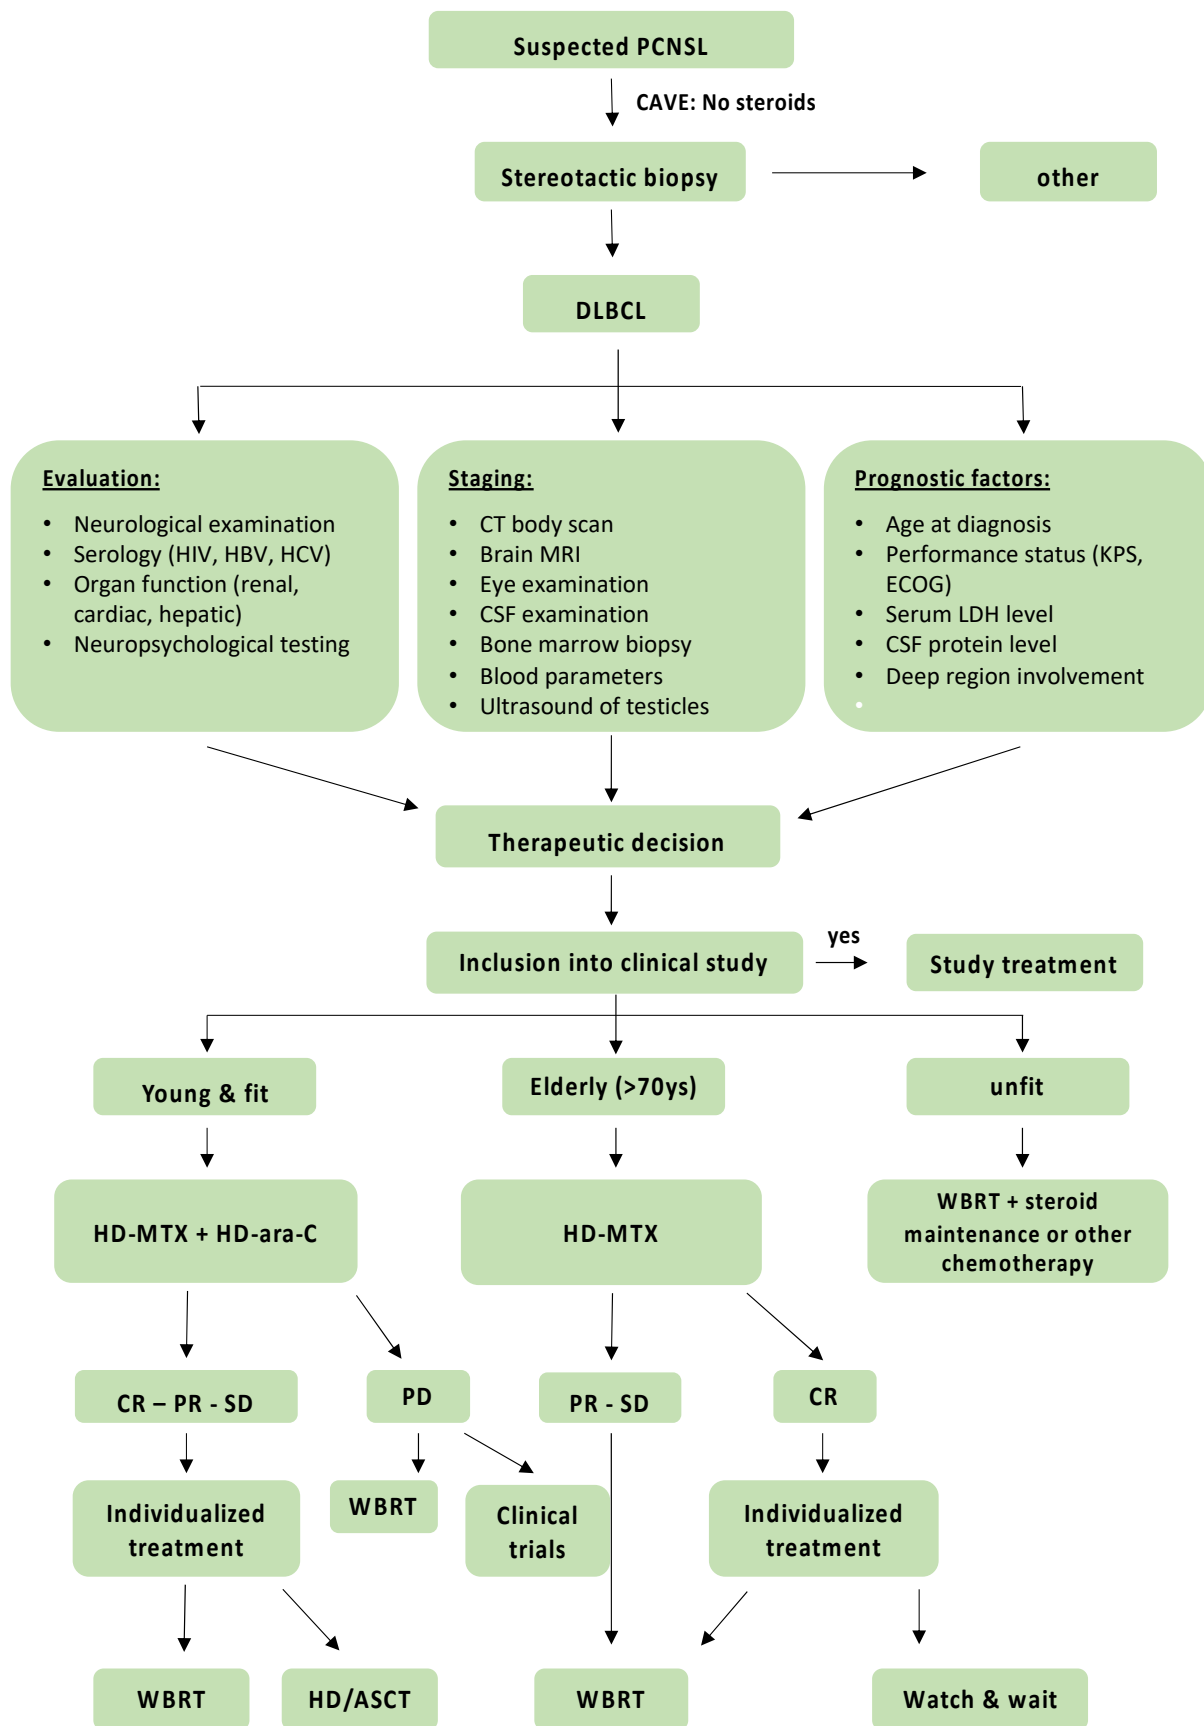

**Supplementary Figure 1: Diagnostic and therapeutic algorithm for suspected PCNSL.** MRI: magnet resonance imaging; HIV: human immunodeficiency virus; HBV: hepatitis B virus; HCV: hepatitis C virus; CT: computer tomography; CSF: cerebrospinal fluid; KPS: Karnofsky Performance index; LDH: Lactate dehydrogenase; HD-MTX: high-dosage Methotrexate; HD-ara-C: high-

dosage cytarabine; CR: complete remission; PR: partial remission; SD: stable disease; CR: complete remission; WBRT: whole brain radiotherapy; ASCT: autologous stem cell therapy. Modified from Ferreri et al. (2011).
